# Supplementary material
Source: PubMed Central journal article supplement (PMC8377981)
Supplement: 13075_2021_2600_MOESM1_ESM.pdf [file 13075_2021_2600_MOESM1_ESM.pdf]

**Additional file 1.** Dietary recommendations for optimal adherence to the Mediterranean Diet.

---

**Recommendations for optimal adherence to the Mediterranean Diet**

---

Dietary recommendations given by the nutritionist at every assessment.

---

**Daily caloric intake**

The daily caloric intake should be provided for 55% from carbohydrates, of which 10% simple sugars; 20-30% from lipids, of which 1/3 saturated lipids, 1/3 monounsaturated, and 1/3 polyunsaturated; 10-15% from proteins, of which 1/3 of animal origin and finally 25-30g of dietary fibers are recommended.

**Ration nutrients**

The daily ration of nutrients must be divided into 3 main meals (breakfast lunch and dinner) and two snacks; breakfast must provide 20% of the calorie intake, lunch 35%, dinner 30% and finally each snack about 7%.

**Lifestyle**

It is highly recommended to adopt a non-sedentary lifestyle and to practice on a regular basis physical activity.

**Specific meal recommendations**

**Consumption at every meal**

- cereals, one or two portions per meal in the form of bread, pasta, rice or others preferably of whole wheat;
- vegetables, two or more portions per meal;
- fruit, one or two portions per meal, preferably in variety.

**Daily consumption**

- moderate quantities of dairy products with preference for low-fat ones;
- replace fats for cooking with extra virgin olive oil;
- consume mixed nuts and seeds;
- adequate intake of 1.5-2L of water per day;
- moderate use of wine during meals is allowed (one glass for women and two for men)

**Weekly consumption**

- fish and sea food, two portions or more
- white meat, two portions or more
- red meat, less than one serving per week
- eggs, two to four portions;
- legumes, more than two portions a week
- potatoes, three or less portions per week

**Occasional consumption**

- sweets and sugary drinks
