# Supplementary material
Source: PubMed Central journal article supplement (PMC8377981)
Supplement: 13075_2021_2600_MOESM2_ESM.pdf [file 13075_2021_2600_MOESM2_ESM.pdf]

## Additional file 2. The Italian version of PREDIMED questionnaire

### QUESTIONARIO DI VALUTAZIONE DELL'ADERENZA AL MODELLO DI ALIMENTAZIONE MEDITERRANEA

|    |                                                                                                                                                          |                                                                                                                            |
|----|----------------------------------------------------------------------------------------------------------------------------------------------------------|----------------------------------------------------------------------------------------------------------------------------|
| 1  | Utilizza l'olio di oliva come principale grasso per cucinare?                                                                                            | <input type="checkbox"/> Sì<br><input type="checkbox"/> No                                                                 |
| 2  | Quanto olio consuma al giorno (inclusi frittute, insalate, pasti fuori casa, ecc)?                                                                       | <input type="checkbox"/> meno di 4 cucchiai da tavola (=10 g)<br><input type="checkbox"/> ≥ 4 cucchiai                     |
| 3  | Quante porzioni di verdura consuma al giorno (1 porzione=200 g; considerare il contorno come una mezza porzione) ?                                       | <input type="checkbox"/> meno di 2 porzioni<br><input type="checkbox"/> ≥ 2 oppure ≥1 porzione di verdura cruda o insalata |
| 4  | Quante porzioni di frutta consuma al giorno, inclusi i succhi di frutta naturali (1 porzione=200 g) ?                                                    | <input type="checkbox"/> meno di 3<br><input type="checkbox"/> ≥ 3                                                         |
| 5  | Quante porzioni di carne rossa, insaccati consuma al giorno (1 porzione=100-150 g) ?                                                                     | <input type="checkbox"/> meno di 1<br><input type="checkbox"/> ≥ 1                                                         |
| 6  | Quante porzioni di burro, margarina e creme consuma al giorno (1 porzione=12 g) ?                                                                        | <input type="checkbox"/> meno di 1<br><input type="checkbox"/> ≥ 1                                                         |
| 7  | Quanti bevande zuccherate o gassate consuma al giorno ?                                                                                                  | <input type="checkbox"/> meno di 1<br><input type="checkbox"/> ≥ 1                                                         |
| 8  | Quanto vino consuma alla settimana ?                                                                                                                     | <input type="checkbox"/> meno di 7 bicchieri<br><input type="checkbox"/> ≥ 7 bicchieri (125 ml)                            |
| 9  | Quante porzioni di legumi consuma alla settimana (1 porzione=150 g) ?                                                                                    | <input type="checkbox"/> meno di 3<br><input type="checkbox"/> ≥ 3                                                         |
| 10 | Quante porzioni di pesce e frutti di mare consuma alla settimana (1 porzione = 100-150 g di pesce oppure 200 g di frutti di mare oppure 4-5 pezzi)       | <input type="checkbox"/> meno di 3<br><input type="checkbox"/> ≥ 3                                                         |
| 11 | Quante volte alla settimana consuma dolci confezionati ?                                                                                                 | <input type="checkbox"/> meno di 3<br><input type="checkbox"/> ≥ 3                                                         |
| 12 | Quante porzioni di frutta secca (incluse le arachidi) consuma alla settimana (1 porzione=30 g)                                                           | <input type="checkbox"/> meno di 3<br><input type="checkbox"/> ≥ 3                                                         |
| 13 | Consuma preferenzialmente carne di pollo, tacchino e coniglio invece che vitello, maiale, hamburgers o salsicce?                                         | <input type="checkbox"/> Sì<br><input type="checkbox"/> No                                                                 |
| 14 | Quante volte alla settimana consuma vegetali, pasta, riso, altri cereali conditi con sugo semplice di pomodoro (pomodoro, cipolla, porro, olio, aglio) ? | <input type="checkbox"/> meno di 2<br><input type="checkbox"/> ≥ 2                                                         |
