# Supplementary material
Source: PubMed Central journal article supplement (PMC8377981)
Supplement: 13075_2021_2600_MOESM3_ESM.pdf [file 13075_2021_2600_MOESM3_ESM.pdf]

**Additional file 3. Cardiovascular risk indices.**

| <b>SCORE<sup>1</sup></b><br><b>(for low cardiovascular risk countries)</b>                                                                                                                                                                                                                                                                                                                                                                                                                                                                                                                                                                                                         | <b>CUORE<sup>2</sup></b>                                                                                                                                                                                                                                                                                                                                                                                                                                                                                                                         |
|------------------------------------------------------------------------------------------------------------------------------------------------------------------------------------------------------------------------------------------------------------------------------------------------------------------------------------------------------------------------------------------------------------------------------------------------------------------------------------------------------------------------------------------------------------------------------------------------------------------------------------------------------------------------------------|--------------------------------------------------------------------------------------------------------------------------------------------------------------------------------------------------------------------------------------------------------------------------------------------------------------------------------------------------------------------------------------------------------------------------------------------------------------------------------------------------------------------------------------------------|
| <p><b>Subjects:</b> men and women with no previous cardiovascular event, smokers and non-smokers, aged between 40 and 65 years, with systolic blood pressure between 120 and 180 mmHg and with a total cholesterol between 150 to 310 mg/dl.</p> <p><b>Parameters:</b> sex, age, systolic blood pressure and total cholesterol/high density lipoprotein cholesterol ratio.</p> <p><b>Interpretation:</b> the number in the cells of the chart represents the 10-year risk of fatal cardiovascular events expressed as an absolute value (% , 0-47%). No adjustment of the cardiovascular risk score computed with SCORE is recommended in axial spondyloarthritis<sup>3</sup>.</p> | <p><b>Subjects:</b> men and women who have not had a previous cardiovascular event, diabetics and non-diabetics, smokers and non-smokers, aged between 40 and 69 years, with systolic blood pressure between 90 and 200 mmHg, with total cholesterol between 130 to 320 mg/dl.</p> <p><b>Parameters:</b> sex, age, diagnosis of diabetes, SBP and total cholesterol .</p> <p><b>Interpretation:</b> the number in cells of the chart represents the 10 year risk of fatal and non-fatal cardiovascular events expressed as risk classes (%).</p> |

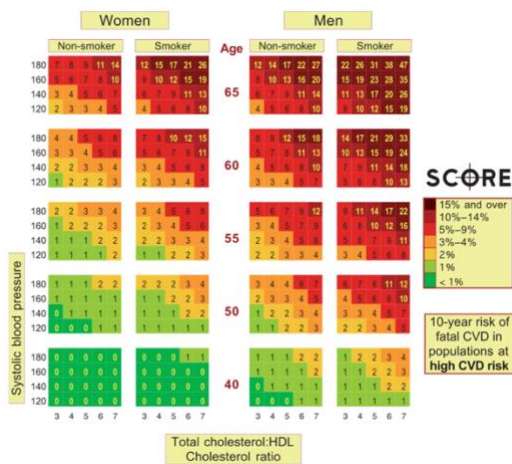

**Carte ITALIANE - progetto CUORE**

Rischio di eventi CV fatali e NON fatali a 10 anni

Il rischio di eventi CV fatali e NON fatali è espresso in valore assoluto (%).

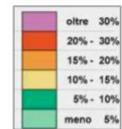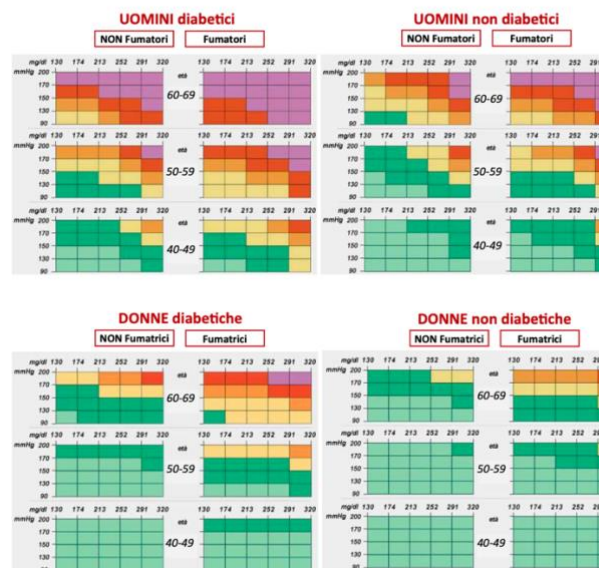

1. de Campos, O. A. M. et al. Assessment of cardiovascular risk in patients with rheumatoid arthritis using the SCORE risk index. *Rev. Bras. Reumatol.* **56**, 138–144 (2016).
2. Giampaoli, S. et al. [Assessment of the absolute global cardiovascular risk: comparison between the risk chart and the individual score of the CUORE Project]. *G. Ital. Cardiol. (Rome)*. **7**, 359–364 (2006).
3. Peters, M. J. L. et al. EULAR evidence-based recommendations for cardiovascular risk management in patients with rheumatoid arthritis and other forms of inflammatory arthritis. *Ann. Rheum. Dis.* **69**, 325–331 (2010).
