# Supplementary material
Source: PubMed Central journal article supplement (PMC8377981)
Supplement: 13075_2021_2600_MOESM5_ESM.pdf [file 13075_2021_2600_MOESM5_ESM.pdf]

**Additional file 5.** Characteristics of the patients according to the achievement of an improvement in the PREDIMED score

|                                                         | All        | ≥20%<br>PREDIMED<br>improvement | <20%<br>PREDIMED<br>improvement |
|---------------------------------------------------------|------------|---------------------------------|---------------------------------|
| Number of patients                                      | 110        | 35                              | 75                              |
| Nutritional group, n (%)¶                               | 47 (42.7)  | 22 (62.9)                       | 25 (33.3)                       |
| Females, n (%)                                          | 40 (36.4)  | 12 (32.9)                       | 28 (34.6)                       |
| Age, years, mean±SD*¶                                   | 51.7±1.3   | 54.2±1.4                        | 47.1±1.4                        |
| Schooling                                               |            |                                 |                                 |
| Primary school, n (%)                                   | 8 (7.3)    | 3 (8.6)                         | 5 (6.2)                         |
| Middle school, n (%)                                    | 45 (40.9)  | 10 (28.6)                       | 35 (43.1)                       |
| Secondary school, n (%)                                 | 36 (32.7)  | 12 (34.3)                       | 24 (35.4)                       |
| University, n (%)                                       | 21 (19.1)  | 10 (28.6)                       | 11 (15.4)                       |
| Social status                                           |            |                                 |                                 |
| Living with parents and family, n (%)                   | 15 (13.6)  | 3 (8.6)                         | 12 (16.9)                       |
| Living alone, n (%)                                     | 16 (14.5)  | 3 (8.6)                         | 13 (16.9)                       |
| Living with partner and family, n (%)                   | 71 (64.5)  | 27 (77.1)                       | 44 (58.7)                       |
| Other, n (%)                                            | 8 (7.3)    | 2 (5.7)                         | 6 (6.2)                         |
| Full- or Part-time employed n(%)*¶                      | 76 (69.1)  | 27 (77.1)                       | 49 (65.3)                       |
| Smoking, current, n (%)                                 | 17 (15.5)  | 5 (14.3)                        | 12 (13.8)                       |
| Psoriasis, n (%)¶                                       | 58 (52.7)  | 18 (51.4)                       | 40 (53.8)                       |
| Disease duration (years), mean±SD*¶                     | 15.3±9.7   | 11.9±9.3                        | 16.7±9.6                        |
| Mechanism of action of current b/tsDMARD                |            |                                 |                                 |
| TNFα inhibitors, n (%)¶                                 | 85 (77.3)  | 29 (82.9)                       | 56 (74.7)                       |
| IL-12/23 inhibitors, n (%)                              | 9 (8.2)    | 2 (5.7)                         | 7 (7.7)                         |
| IL-17 inhibitors, n (%)                                 | 14 (12.7)  | 4 (11.4)                        | 10 (13.8)                       |
| PDE4 inhibitors, n (%)                                  | 2 (1.8)    | 0 (0)                           | 2 (3.1)                         |
| Duration of b/tsDMARD treatment overall, years, mean±SD | 5±4.1      | 5.8±4.5                         | 4.6±3.8                         |
| Low dose b/tsDMARD treatment, n (%)                     | 28 (25.5)  | 8 (22.9)                        | 20 (27.7)                       |
| b/tsDMARD naïve patients, n (%)                         | 81 (73.6)  | 23 (65.7)                       | 58 (77.3)                       |
| No. of b/tsDMARD treatments, mean±SD                    | 1.5±0.9    | 1.5±0.9                         | 1.5±1                           |
| Steroid, n (%)                                          | 9 (8.2)    | 1 (2.9)                         | 8 (9.2)                         |
| NSAID, n (%)                                            | 76 (69.1)  | 25 (71.4)                       | 51 (69.2)                       |
| csDMARD, n (%)                                          | 14 (12.7)  | 4 (11.4)                        | 10 (13.3)                       |
| Concomitant treatments, n (%)¶                          | 72 (65.5)  | 16 (45.7)                       | 56 (74.7)                       |
| Distance from clinic, km, mean±SD                       | 36.1±47.2  | 39.8±67.5                       | 35.2±35.7                       |
| BMI, Kg/m <sup>2</sup> , mean±SD*¶                      | 26.5±5.4   | 24.7±4                          | 27±6.3                          |
| SBP, mmHg, mean±SD                                      | 128.7±14.9 | 130±12.7                        | 127±16.1                        |
| ASDAS-CRP, mean±SD                                      | 2.1±1      | 2.0±0.8                         | 2.2±1                           |
| ASDAS-ESR, mean±SD                                      | 2.2±1      | 2±0.9                           | 2.3±1.1                         |

*Continued on next page*

Continued from previous page

|                                                  |               |               |             |
|--------------------------------------------------|---------------|---------------|-------------|
| BASDAI, mean±SD                                  | 37.6±23       | 37±24         | 38±22       |
| BASFI, mean±SD                                   | 20.5±21.4     | 16±17         | 23±22       |
| BASMI, mean±SD                                   | 1.6±2         | 1.8±1.7       | 1.7±2.1     |
| Patient VAS global, mean±SD¶                     | 35.5±31.5     | 31.3±29.2     | 37.7±32.1   |
| Patient VAS pain, mean±SD                        | 35.3±29.5     | 30.6±26.1     | 38.5±30.7   |
| Physician VAS, mean±SD                           | 35.8±28       | 30.3±23.2     | 38.6±28.8   |
| HAQ, mean±SD                                     | 0.5±0.5       | 0.3±0.5       | 0.5±0.6     |
| TJC, mean±SD                                     | 1.1±2.3       | 0.9±1.7       | 1.3±2.7     |
| SJC, mean±SD                                     | 0.3±1.3       | 0.5±2.2       | 0.2±0.6     |
| Dactylitis, n (%)                                | 5 (4.5)       | 2 (5.7)       | 3 (4)       |
| MASES, mean±SD                                   | 1±2.2         | 1±2.3         | 1±2.2       |
| LEI, mean±SD                                     | 0.2±0.8       | 0.2±0.5       | 0.3±1       |
| PASI, mean±SD                                    | 0.9±1.9       | 1.1±3         | 0.7±1.3     |
| I-CQR5 poorly Adherent, n (%)                    | 9 (8.2)       | 6 (17.1)      | 3 (4)       |
| Physical activity, n (%)                         | 47 (42.7)     | 22 (52.9)     | 25 (33.3)   |
| HB, g/dl, mean ±SD                               | 14.3±1.3      | 14.4±1.1      | 14.2±1.4    |
| WBC, 1/mm <sup>3</sup> , mean ±SD                | 6684.6±1809.9 | 6333.7±1366.4 | 6758±1919.7 |
| PLT, 10 <sup>3</sup> /mm <sup>3</sup> , mean ±SD | 267.5±229.1   | 306.2±393.7   | 250.3±72    |
| CRP, mg/L, mean ±SD*¶                            | 3.4±6.2       | 1.9±2.1       | 4±7         |
| ESR, mm/h, mean ±SD                              | 15.2±17.1     | 11.8±11.8     | 17.8±19.8   |
| Urate, mg/dl, mean ±SD                           | 5.5±1.1       | 5.4±0.7       | 5.6±1.3     |
| HbA1c, mmol/mol, mean ±SD                        | 47.4±15       | 55±14.1       | 45.1±18.2   |
| FBG, mg/dl, mean ±SD                             | 105.1±26.5    | 115.1±33.5    | 103±25.9    |
| LDL-c, mg/dl, mean ±SD                           | 130.8±36.5    | 132.8±30      | 127.5±37    |
| HDL-c, mg/dl, mean ±SD                           | 54.7±15.4     | 58.9±18       | 53.8±15     |
| TC, mg/dl, mean ±SD                              | 209.7±45.1    | 220.8±42.8    | 200.6±44.7  |
| Triglycerides, mg/dl, mean ±SD                   | 123.2±63.4    | 120.6±60.8    | 121.3±71    |
| GOT, U/L, mean ±SD                               | 22.4±8.7      | 21.6±8.6      | 22.6±8.6    |
| GPT, U/L, mean ±SD                               | 24.4±15       | 21.8±9        | 25.2±17.8   |
| GGT, U/L, mean ±SD                               | 21.8±19.1     | 21.1±14.3     | 21±18.4     |
| Creatinine, mg/dl, mean ±SD                      | 0.9±0.2       | 0.9±0.2       | 0.9±0       |
| TSH, µU/ml, mean ±SD                             | 3.2±2         | 2.9±0.6       | 3.3±2.2     |

\*Variables achieving a p<0.05 in univariate analysis

¶variables included in the multivariate analysis to identify predictors of ≥20% improvement in the PREDIMED score as achieving a p<0.10 in univariate analysis

b/tsDMARD biological/targeted synthetic disease-modifying antirheumatic drug; NSAID nonsteroidal anti-inflammatory drug; csDMARD conventional synthetic disease modifying antirheumatic drug; BMI body mass index; SBP systolic blood pressure; ASDAS-CRP Ankylosing Spondylitis Disease Activity Score containing C-reactive protein; ASDAS-ESR Ankylosing Spondylitis Disease Activity Score containing erythrocyte sedimentation rate; BASDAI Bath Ankylosing Spondylitis Disease Activity Index; BASFI Bath Ankylosing Spondylitis Functional Index; BASMI Bath Ankylosing Score Metrology Index; VAS Visual Analogue Scale; HAQ Health Assessment Questionnaire; TJC tender joint count; SJC swollen joint count; MASES Maastricht Ankylosing Spondylitis Enthesitis Score; LEI Leeds Enthesitis Index; PASI Psoriasis Area Severity Index; I-CQR5 italian version of 5-item Compliance Questionnaire for Rheumatology; HB hemoglobin; WBC white blood count; PLT platelets; ESR erythrocyte sedimentation rate; CRP C-reactive protein; HbA1c glycated hemoglobin; FBG fasting blood glucose; LDL-c low density lipoprotein cholesterol; HDL-c high density lipoprotein cholesterol; TC total cholesterol; GOT glutamic oxaloacetic transaminase; GPT glutamic pyruvic transaminase; GGT gamma-glutamyltransferase; TSH thyroid-stimulating hormone.
