# Supplementary material
Source: PubMed Central journal article supplement (PMC8377981)
Supplement: 13075_2021_2600_MOESM6_ESM.pdf [file 13075_2021_2600_MOESM6_ESM.pdf]

**Additional file 6.** Characteristics of the patients according to the achievement of an improvement in ASDAS-CRP.

|                                                         | All        | ≥20% ASDAS-CRP improvement | <20% ASDAS-CRP improvement |
|---------------------------------------------------------|------------|----------------------------|----------------------------|
| Number of patients                                      | 110        | 14                         | 96                         |
| Nutritional group, n (%) <sup>*¶</sup>                  | 47 (42.7)  | 8 (57.1)                   | 39 (40.6)                  |
| ≥ 20% PREDIMED improvement, n (%) <sup>*¶</sup>         | 35 (31.8)  | 12 (85.7)                  | 23 (24)                    |
| PREDIMED change, mean±SD                                | 1±2.3      | 1.7±0.1                    | 0.7±0.4                    |
| Females, n (%)                                          | 40 (36.4)  | 4 (28.6)                   | 36 (38.4)                  |
| Age, years, mean±SD <sup>*¶</sup>                       | 51.7±13.7  | 54.2±13.2                  | 50.3±1.4                   |
| Schooling                                               |            |                            |                            |
| Primary school, n (%)                                   | 8 (7.3)    | 0 (0)                      | 8 (8.1)                    |
| Middle school, n (%)                                    | 45 (40.9)  | 5 (35.7)                   | 40 (38.4)                  |
| Secondary school, n (%)                                 | 36 (32.7)  | 7 (50)                     | 29 (32.6)                  |
| University, n (%)                                       | 21 (19.1)  | 2 (14.3)                   | 19 (20.9)                  |
| Social status                                           |            |                            |                            |
| Living with parents and family, n (%)                   | 15 (13.6)  | 4 (28.6)                   | 11 (11.6)                  |
| Living alone, n (%)                                     | 16 (14.5)  | 2 (14.3)                   | 14 (14)                    |
| Living with partner and family, n (%)                   | 71 (64.5)  | 8 (57.1)                   | 63 (67.4)                  |
| Other, n (%)                                            | 8 (7.3)    | 0 (0)                      | 8 (8)                      |
| Full- or Part-time employed n(%)                        | 76 (69.1)  | 11 (78.6)                  | 65 (67.7)                  |
| Smoking, current, n (%)                                 | 17 (15.5)  | 3 (21.4)                   | 14 (12.8)                  |
| Psoriasis, n (%) <sup>*¶</sup>                          | 58 (52.7)  | 3 (21.4)                   | 55 (57.3)                  |
| Disease duration (years), mean±SD                       | 15.3±9.7   | 15±9.9                     | 15.6±9.6                   |
| Mechanism of action of current b/tsDMARD                |            |                            |                            |
| TNFα inhibitors, n (%)                                  | 85 (77.3)  | 12 (85.7)                  | 73 (76.7)                  |
| IL-12/23 inhibitors, n (%)                              | 9 (8.2)    | 2 (14.3)                   | 7 (5.8)                    |
| IL-17 inhibitors, n (%)                                 | 14 (12.7)  | 0 (0)                      | 14 (15.1)                  |
| PDE4 inhibitors, n (%)                                  | 2 (1.8)    | 0 (0)                      | 2 (2.3)                    |
| Duration of b/tsDMARD treatment overall, years, mean±SD | 5±4.1      | 5.7±5.1                    | 4.5±3.5                    |
| Low dose b/tsDMARD treatment, n (%)                     | 28 (25.5)  | 3 (21.4)                   | 25 (26.7)                  |
| b/tsDMARD naïve patients, n (%)                         | 81 (73.6)  | 9 (64.3)                   | 72 (76.7)                  |
| No. of b/tsDMARD treatments, mean±SD                    | 1.5±0.9    | 1.4±0.6                    | 1.5±1.1                    |
| Steroid, n (%) <sup>¶</sup>                             | 9 (8.2)    | 1 (7.1)                    | 8 (7)                      |
| NSAID, n (%)                                            | 76 (69.1)  | 8 (57.1)                   | 68 (72.1)                  |
| csDMARD, n (%)                                          | 14 (12.7)  | 2 (14.3)                   | 12 (14)                    |
| Concomitant treatments, n (%) <sup>¶</sup>              | 62 (56.4)  | 4 (28.6)                   | 58 (59.2)                  |
| Distance from clinic, km, mean±SD                       | 36.1±47.2  | 48.8±77.6                  | 34±35.6                    |
| BMI, Kg/m <sup>2</sup> , mean±SD                        | 26.5±5.4   | 25.6±4.3                   | 27.1±6.4                   |
| SBP, mmHg, mean±SD                                      | 128.7±14.9 | 130±14                     | 127.4±15.2                 |
| ASDAS-CRP, mean±SD                                      | 2.1±1      | 2±0.9                      | 2±1                        |
| ASDAS-ESR, mean±SD                                      | 2.2±1      | 2.2±1.2                    | 2.2±1                      |

*Continued on next page*

Continued from previous page

|                                                  |               |               |               |
|--------------------------------------------------|---------------|---------------|---------------|
| BASDAI, mean±SD                                  | 37.6±23       | 38±22         | 35±23         |
| BASFI, mean±SD                                   | 20.5±21.4     | 20±21         | 20±21         |
| BASMI, mean±SD                                   | 1.6±2         | 1.2±1.3       | 2.1±2.2       |
| Patient VAS global, mean±SD*¶                    | 35.5±31.5     | 38.4±33.6     | 32.1±30.1     |
| Patient VAS pain, mean±SD*¶                      | 35.3±29.5     | 35.8±30.7     | 32.5±28.6     |
| Physician VAS, mean±SD                           | 35.8±28       | 32.8±24.8     | 36.5±28       |
| HAQ, mean±SD                                     | 0.5±0.5       | 0.6±0.6       | 0.4±0.4       |
| TJC, mean±SD                                     | 1.1±2.3       | 0.6±1.5       | 1.4±2.8       |
| SJC, mean±SD                                     | 0.3±1.3       | 0.1±0.4       | 0.2±0.6       |
| Dactylitis, n (%)                                | 5 (4.5)       | 1 (7.1)       | 4 (4.2)       |
| MASES, mean±SD                                   | 1±2.2         | 1.2±2.6       | 0.8±2         |
| LEI, mean±SD                                     | 0.2±0.8       | 0.4±1         | 0.2±0.8       |
| PASI, mean±SD                                    | 0.9±1.9       | 1.8±3.9       | 0.6±1.2       |
| I-CQR5 poorly Adherent, n (%)                    | 9 (8.2)       | 0 (0)         | 9 (9.3)       |
| Physical activity, n (%)                         | 47 (42.7)     | 6 (42.9)      | 41 (42.7)     |
| HB, g/dl, mean ±SD                               | 14.3±1.3      | 14.6±1.3      | 14.1±1.3      |
| WBC, 1/mm <sup>3</sup> , mean ±SD                | 6684.6±1809.9 | 6173.2±1349.6 | 6751.1±1743.9 |
| PLT, 10 <sup>3</sup> /mm <sup>3</sup> , mean ±SD | 267.5±229.1   | 221.8±57.6    | 289.5±292.7   |
| CRP, mg/L, mean ±SD                              | 3.4±6.2       | 3.5±3.3       | 3.1±6.3       |
| ESR, mm/h, mean ±SD                              | 15.2±17.1     | 17.2±24.8     | 15.6±15.1     |
| Urate, mg/dl, mean ±SD                           | 5.5±1.1       | 6±0           | 5.5±1.3       |
| HbA1c, mmol/mol, mean ±SD                        | 47.4±15       | 54±14.1       | 44.3±19.1     |
| FBG, mg/dl, mean ±SD                             | 105.1±26.5    | 116.3±36.7    | 103.3±25.9    |
| LDL-c, mg/dl, mean ±SD                           | 130.8±36.5    | 125.8±39.8    | 130.2±31      |
| HDL-c, mg/dl, mean ±SD                           | 54.7±15.4     | 59.2±16.1     | 53.3±15.9     |
| TC, mg/dl, mean ±SD                              | 209.7±45.1    | 200.7±43.8    | 2011.7±45.3   |
| Triglycerides, mg/dl, mean ±SD                   | 123.2±63.4    | 113±60.7      | 127.8±73.2    |
| GOT, U/L, mean ±SD                               | 22.4±8.7      | 21.4±7.2      | 22.8±8.3      |
| GPT, U/L, mean ±SD                               | 24.4±15       | 24.4±10.8     | 24.5±17.6     |
| GGT, U/L, mean ±SD                               | 21.8±19.1     | 22±16.4       | 21±18.2       |
| Creatinine, mg/dl, mean ±SD                      | 0.9±0.2       | 0.9±0.2       | 0.9±0         |
| TSH, µU/ml, mean ±SD                             | 3.2±2         | 1.7±2.1       | 23.5±2.3      |

\*Variables achieving a p<0.05 in univariate analysis

¶Variables included in the multivariate analysis to identify predictors of ≥20% improvement in ASDAS-CRP as achieving a p<0.10 in univariate analysis

b/tsDMARD biological/targeted synthetic disease-modifying antirheumatic drug; NSAID nonsteroidal anti-inflammatory drug; csDMARD conventional synthetic disease modifying antirheumatic drug; BMI body mass index; SBP systolic blood pressure; ASDAS-CRP Ankylosing Spondylitis Disease Activity Score containing C-reactive protein; ASDAS-ESR Ankylosing Spondylitis Disease Activity Score containing erythrocyte sedimentation rate; BASDAI Bath Ankylosing Spondylitis Disease Activity Index; BASFI Bath Ankylosing Spondylitis Functional Index; BASMI Bath Ankylosing Score Metrology Index; VAS Visual Analogue Scale; HAQ Health Assessment Questionnaire; TJC tender joint count; SJC swollen joint count; MASES Maastricht Ankylosing Spondylitis Enthesitis Score; LEI Leeds Enthesitis Index; PASI Psoriasis Area Severity Index; I-CQR5 Italian version of 5-item Compliance Questionnaire for Rheumatology; HB hemoglobin; WBC white blood count; PLT platelets; ESR erythrocyte sedimentation rate; CRP C-reactive protein; HbA1c glycated hemoglobin; FBG fasting blood glucose; LDL-c low density lipoprotein cholesterol; HDL-c high density lipoprotein cholesterol; TC total cholesterol; GOT glutamic oxaloacetic transaminase; GPT glutamic pyruvic transaminase; GGT gamma-glutamyltransferase; TSH thyroid-stimulating hormone.
