# Supplementary material
Source: PubMed Central journal article supplement (PMC8377981)
Supplement: 13075_2021_2600_MOESM7_ESM.pdf [file 13075_2021_2600_MOESM7_ESM.pdf]

**Additional file 7.** Cardiovascular risk indices in the study.

|                                                | <b>All patients*</b> | <b>N</b>  | <b>C</b>  |
|------------------------------------------------|----------------------|-----------|-----------|
| <b>SCORE</b>                                   |                      |           |           |
| Applicable patients, n                         | 72                   | 24        | 48        |
| T0 value, mean±SD                              | 1.7±1.7              | 1.7±1.6   | 1.7±1.7   |
| T6 value, mean±SD                              | 1.5±1.6              | 1.4±1.5   | 1.6±1.7   |
| Change, mean±SD                                | -0.2±0.8             | -0.4±0.7  | -0.1±1    |
| SCORE improvement ≥1 unit from T0, n (%)       | 18 (16.4)            | 10 (21.3) | 8 (12.7)  |
| <b>CUORE</b>                                   |                      |           |           |
| Applicable patients, n                         | 79                   | 35        | 44        |
| <b>T0</b>                                      |                      |           |           |
| <5% risk, n (%)                                | 42 (53.7)            | 19 (53.3) | 23 (54.1) |
| 5-10% risk, n (%)                              | 12 (14.9)            | 7 (20)    | 5 (10.8)  |
| 10-15% risk, n (%)                             | 20 (25.4)            | 7 (20)    | 13 (29.7) |
| 15-20% risk, n (%)                             | 4 (4.5)              | 2 (6.7)   | 2 (2.7)   |
| 20-30% risk, n (%)                             | 1 (1.5)              | 0 (0)     | 1 (2.7)   |
| >30% risk, n (%)                               | 0 (0)                | 0 (0)     | 0 (0)     |
| <b>T6</b>                                      |                      |           |           |
| <5% risk, n (%)                                | 38 (47.8)            | 15 (43.3) | 23 (51.4) |
| 5-10% risk, n (%)                              | 17 (22.2)            | 10 (30)   | 7 (16.2)  |
| 10-15% risk, n (%)                             | 18 (22.6)            | 7 (20)    | 11 (24.3) |
| 15-20% risk, n (%)                             | 4 (4.5)              | 3 (6.7)   | 1 (2.7)   |
| 20-30% risk, n (%)                             | 2 (3)                | 0 (0)     | 2 (5.4)   |
| >30% risk, n (%)                               | 0 (0)                | 0 (0)     | 0 (0)     |
| CUORE improvement ≥1 risk class from T0, n (%) | 2 (2.5)              | 1 (1.3)   | 1 (1.3)   |

\*No significant differences were observed between the two study groups.

N nutritional group; C control group.
